# Supplementary material for: Electrochemiluminescence resonance energy transfer (ERET) towards trinitrotoluene sensor based on layer-by-layer assembly of luminol-layered double hydroxides and CdTe quantum dots
Source: Royal Society of Chemistry journal article supplement (doi:10.1039/c7tc00100b), 2017-01-01
Supplement: c7tc00100b1.pdf [file c7tc00100b1.pdf]

**Electronic Supplementary Information for**

**Electrochemiluminescence resonance energy transfer (EREF) towards**

**trinitrotoluene sensor based on layer-by-layer assembly of luminol-layered**

**double hydroxides and CdTe quantum dots**

**Zhixiong Li,<sup>‡a</sup> Yuqiong Zhou,<sup>‡a</sup> Dongpeng Yan<sup>\*ab</sup> and Min Wei<sup>a</sup>**

*‡These authors equally contributed to this work.*

*a: State Key Laboratory of Chemical Resource Engineering, Beijing University of Chemical  
Technology, Beijing 100029, P. R. China*

*b: Beijing Key Laboratory of Energy Conversion and Storage Materials, College of Chemistry,  
Beijing Normal University, China.*

\* Corresponding authors.

E-mail addresses: yandongpeng001@163.com; yandp@bnu.edu.cn

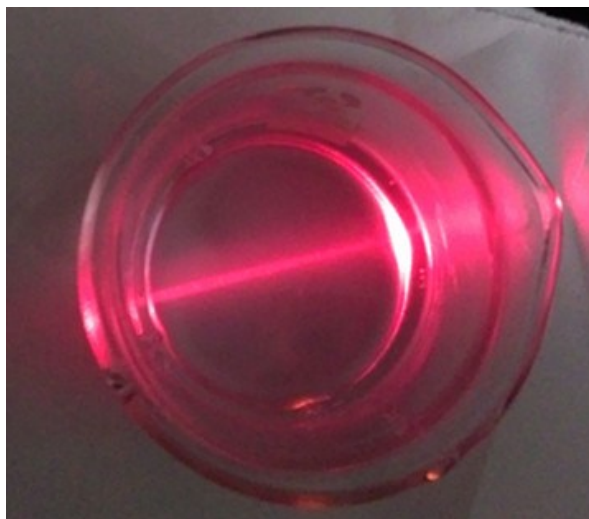

**Figure S1** Photo of a colloidal suspension of 3-AMS-CoAl LDHs.

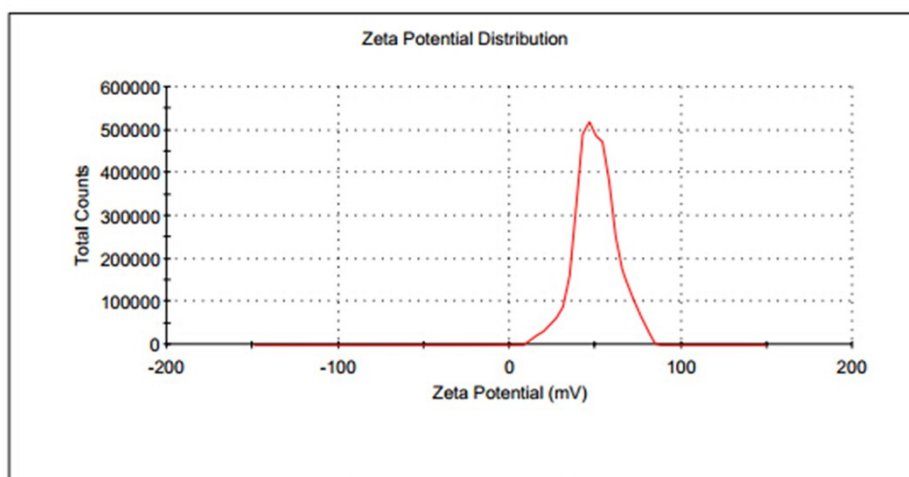

**Figure S2** Zeta potential of a colloidal suspension of 3-AMS-CoAl LDHs.

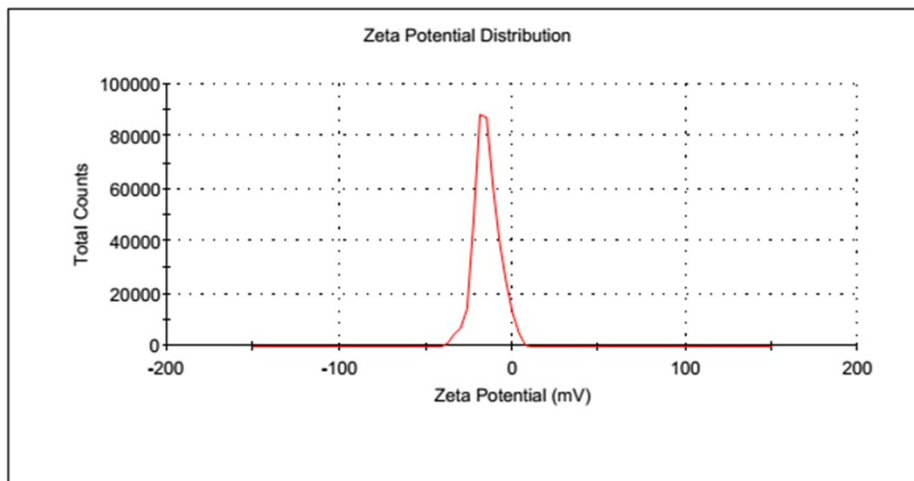

**Figure S3** Zeta potential of CdTe QDs.

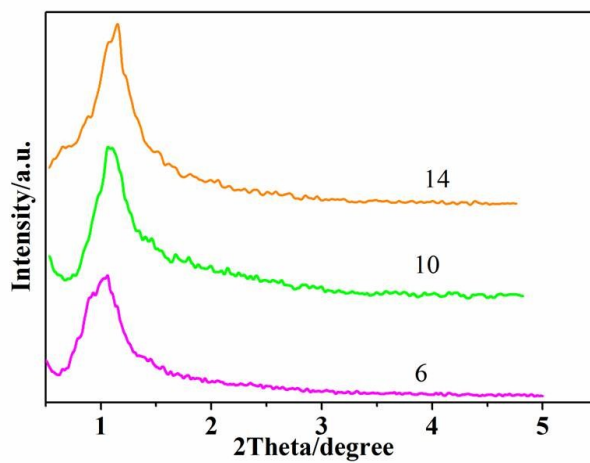

**Figure S4** XRD patterns of (3-AMS-CoAl LDHs/CdTe QDs)<sub>n</sub> (n=6, 10, 14).

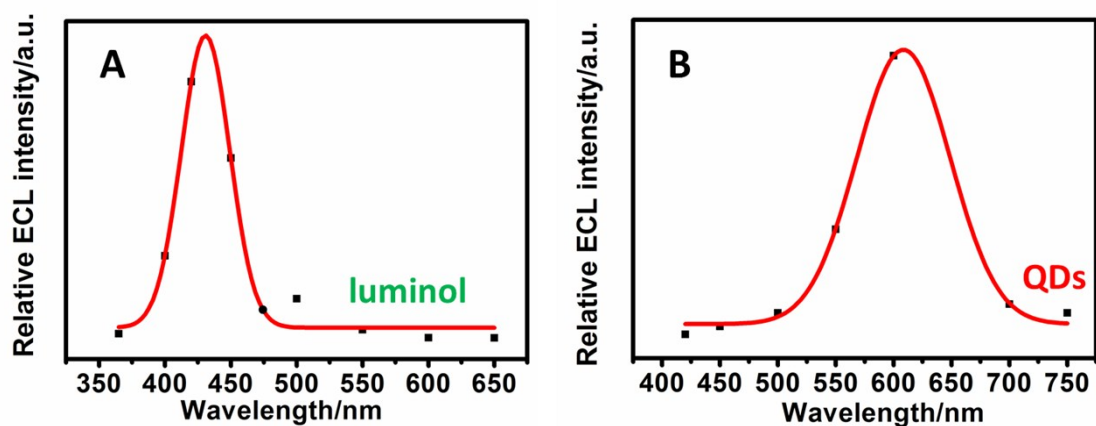

**Figure S5** The relative ECL intensity of (A) luminol and (B) QDs at different wavelengths.

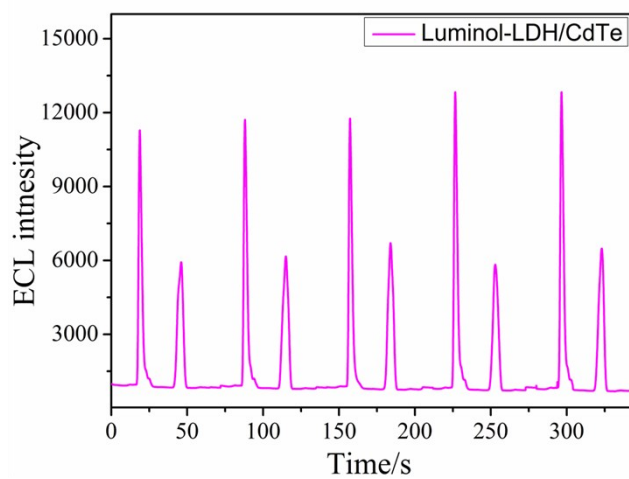

**Figure S6** Stability of (3-AMS-CoAl LDHs/CdTe QDs)<sub>10</sub> film.

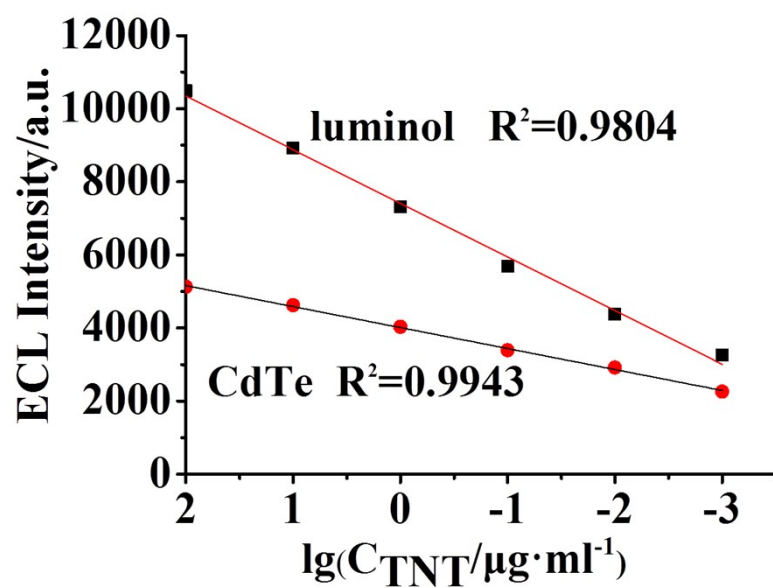

**Figure S7** The plot of ECL intensity vs TNT concentration.

**Table S1** The detection limit for TNT compared with other probes.

|                                | this paper | <i>ACS Appl. Mater. Interfaces</i> 2015, 7, 21038–21046. | <i>Anal. Chem.</i> 2015, 87, 4530–4537. | <i>Angew. Chem.</i> 2008, 120, 8729–8732. | <i>Anal. Chem.</i> 2006, 78, 2279–2285. | <i>J. Mater. Chem. A</i> , 2013, 1, 3561–3564. |
|--------------------------------|------------|----------------------------------------------------------|-----------------------------------------|-------------------------------------------|-----------------------------------------|------------------------------------------------|
| Detection limit for TNT (μg/L) | 0.65       | 1.135                                                    | 998                                     | 0.908-1.589                               | 0.1                                     | 9.1                                            |

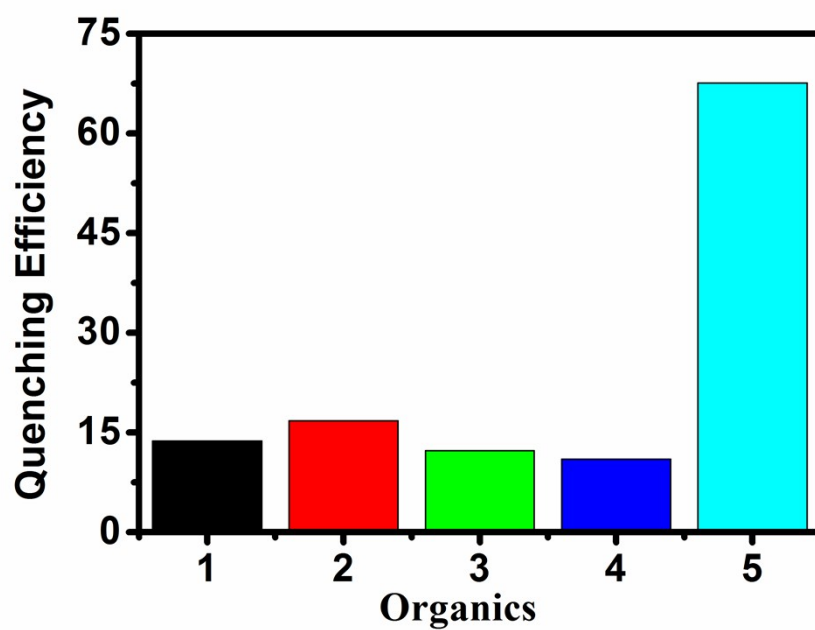

**Figure S8** The extinction of the ECL intensity, normalized to a blank, after being challenged with interfering organics: 1. DNT, 2. NB, 3. TOL, 4. benzene, 5. TNT.
